# Supplementary material
Source: publisher site journal article supplement (https://www.dovepress.com/article/598545)
Supplement: Supplementary file 1 [file 598545%20Supplementary%20Material.docx]

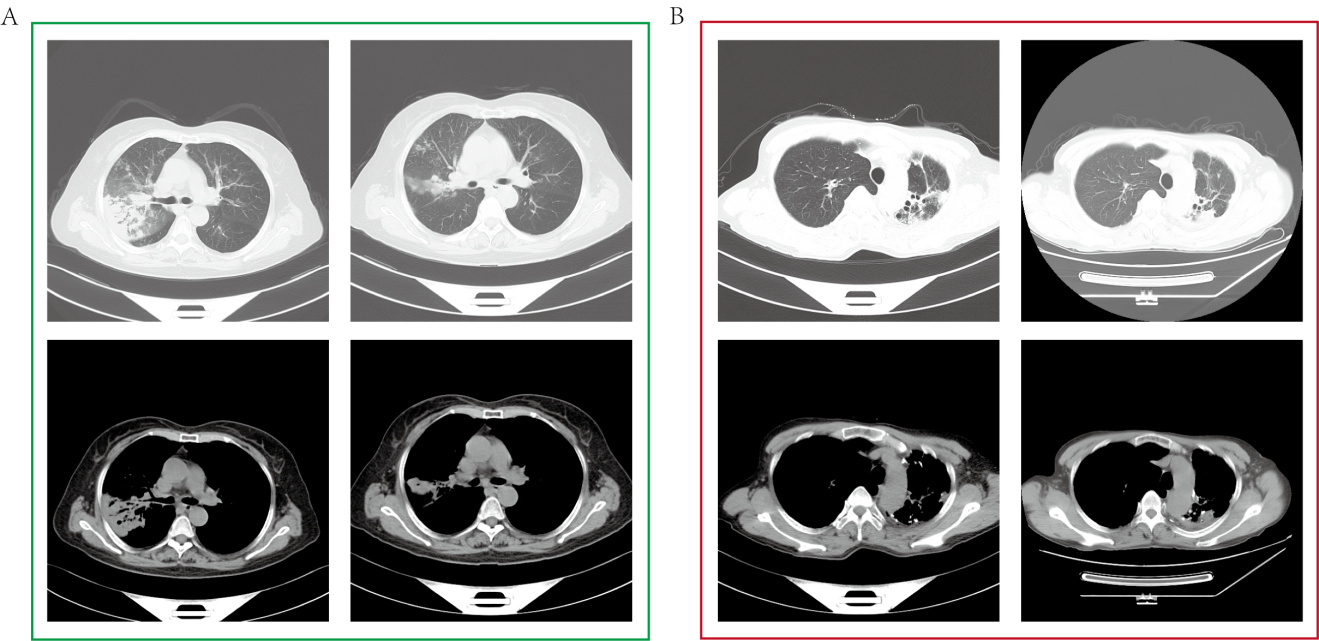


Figure S1. Radiological manifestations of improved and progressive groups

(A) Improved group showing lesion shrinkage and absorption of inflammatory consolidation; (B) Progressive group showing lesion enlargement and fibrotic changes.

Upper left: pre-treatment lung window; upper right: post-treatment lung window; lower left: pre-treatment mediastinal window; lower right: post-treatment mediastinal window.

Table S1. Definitions of study variables

| Column name | Definition / Description |
| --- | --- |
| Group | Patient grouping (1 = sputum-negative group; 2 = non-negative group) |
| Age | Age (years) |
| Systolic_BP | Systolic blood pressure (mmHg), continuous variable |
| Diastolic_BP | Diastolic blood pressure (mmHg), continuous variable |
| BMI | Body mass index (kg/m²), continuous variable |
| Hemoglobin | Hemoglobin (g/L), continuous variable |
| Albumin | Albumin (g/L), continuous variable |
| ESR | Erythrocyte sedimentation rate (mm/h), continuous variable |
| Lymphocyte_count | Lymphocyte count (×10⁹/L), continuous variable |
| Total_protein | Total protein (g/L), continuous variable |
| Creatinine | Creatinine (µmol/L), continuous variable |
| Cholesterol | Cholesterol (mmol/L), continuous variable |
| Triglyceride | Triglyceride (mmol/L), continuous variable |
| Marital_status | Marital status (1 = divorced; 2 = widowed; 3 = unmarried; 4 = married) |
| Smoking | Smoking status (1 = yes; 2 = never; 3 = former/quit) |
| Residence | Residence (1 = rural; 2 = urban) |
| Hyperlipidemia | Hyperlipidemia (1 = yes; 2 = no) |
| Malignancy | Malignancy (1 = yes; 2 = no) |
| Rheumatic_disease | Rheumatic and autoimmune disease (1 = yes; 2 = no) |
| Chronic_bronchitis | Chronic bronchitis (1 = yes; 2 = no) |
| Inflammation | Inflammatory status (1 = positive; 2 = negative) |
